# Supplementary material
Source: PubMed Central journal article supplement (PMC3689969)
Supplement: supp_M113.473199_jbc.M113.473199-1.pdf [file supp_M113.473199_jbc.M113.473199-1.pdf]

**Supplemental File 1. Mass Spectrometry Analysis of HAT1-containing Protein Complex**

| <b>Band</b> | <b>Identified proteins</b> | <b>Peptides</b>                                                                                                                    |
|-------------|----------------------------|------------------------------------------------------------------------------------------------------------------------------------|
| 154 kDa     | RAD50                      | DEMLGLVPMRQSIIDLK<br>EEQLSSYEDK<br>NFQLLVITHDEDFVELLGR                                                                             |
| 90 kDa      | RINT                       | QVSEGTDNGDLPSYVSAFIEK<br>PASAPEIYSYLETLFCQLLK                                                                                      |
| 62 kDa      | HIRIP3                     | LMQGFNEDMAIEAQQK<br>LSGSSEDEEDSGKGPEPTAK<br>ERLSILRAELEALGMK                                                                       |
| 49 kDa      | HAT1                       | LLVTDMSDAEQYR<br>LVRFPEDLENDIR<br>VDENFDCVEADDVEGK<br>LMQGFNEDMAIEAQQK<br>YYTEFPTVLDITAEDPSK<br>EKLMQGFNEDMAIEAQQK                 |
| 48 kDa      | Rbap46                     | RLNVWDLSK<br>GEFGGFGSVTGK<br>ARYMPQNPHEIATK<br>VHIPNDDAQFDASHCDSK<br>IGEEQSAEDAEDGPPPELLFIHGGHTAK<br>TPSSDVLVFDYTKHPAKPDPSGECNPDLR |
| 38 kDa      | RAD51-associated protein 1 | PVNYSQFDHSDSDDDFVSATVPLNK<br>LPEGTFSSIPASAVPCTKMALDDK                                                                              |
| 15 kDa      | H3                         | EIAQDFKTDLR<br>KSAPATGGVKKPHR<br>YRPGTVALR                                                                                         |
| 11 kDa      | H4                         | DAVTYTEHAK<br>GKGGKGLGKGGAK<br>KVLRDNIQGITKPAIR                                                                                    |
